# Supplementary material for: Combined use of serum (1,3)-β-d-glucan and procalcitonin for the early differential diagnosis between candidaemia and bacteraemia in intensive care units
Source: Springer Nature journal article supplement (doi:10.1186/s13054-017-1763-5), 2017-07-10
Supplement: MOESM1 [file 13292420]

**Additional file 1. Fagan’s nomograms of pre-test and post-test probability of candidaemia according to BDG and PCT results. The pre-test and post-test probability of bacteraemia can be calculated as 1 minus the pre-test or post-test probability of candidaemia, respectively.**

Panel a and b. BDG results available and PCT unknown

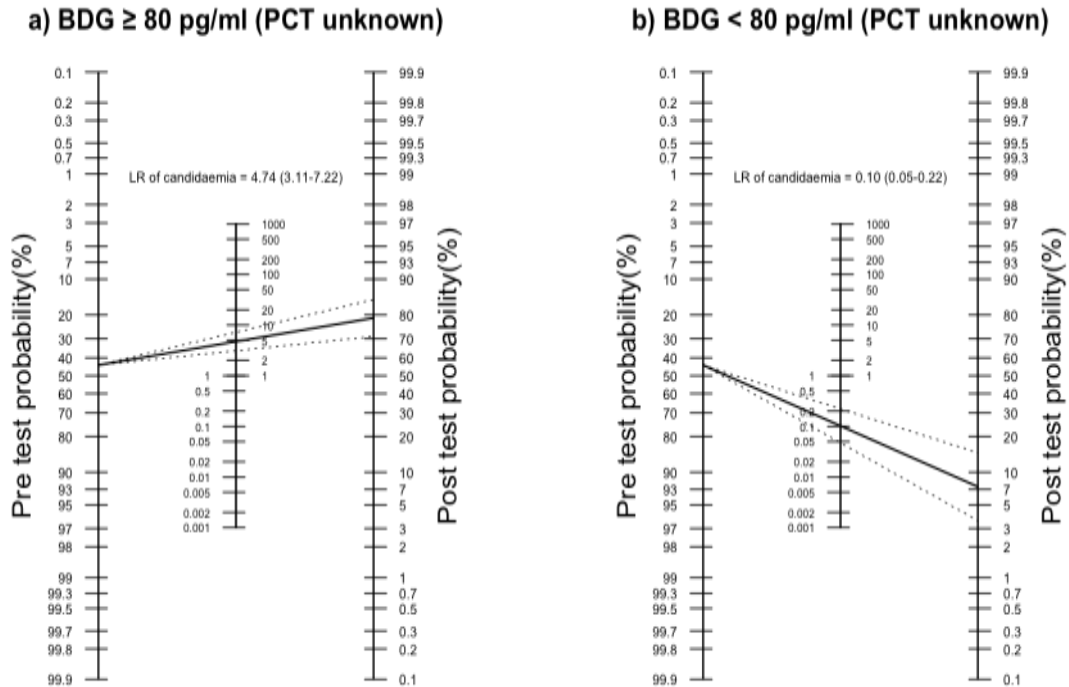

Panel c and d. PCT results available and BDG unknown

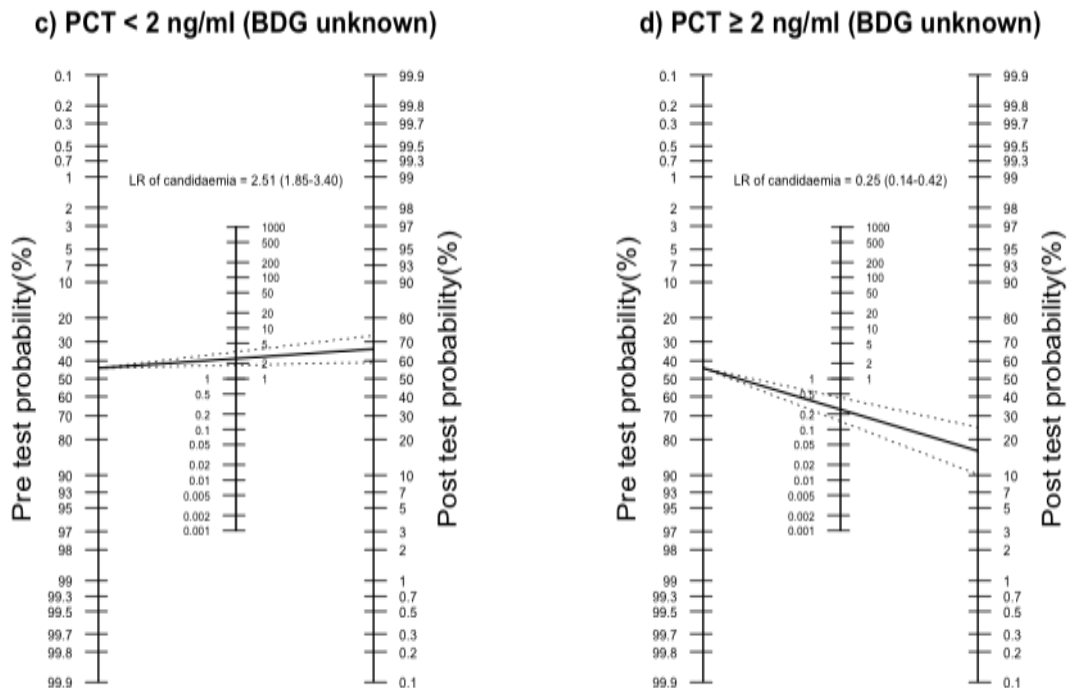

(continue)

Panel e and f. Concordant BDG and PCT results

e) BDG  $\geq$  80 pg/ml and PCT < 2 ng/ml

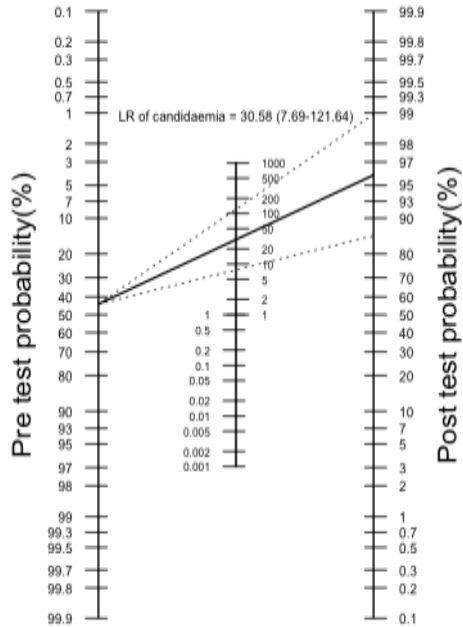

f) BDG < 80 pg/ml and PCT  $\geq$  2 ng/ml

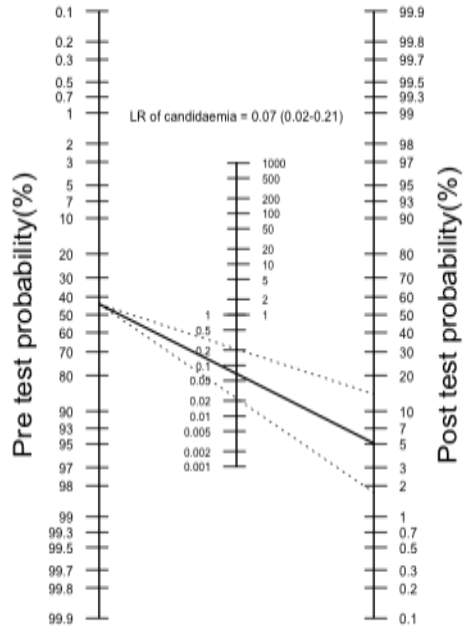

Panel g and h. Discordant BDG and PCT results

g) BDG  $\geq$  80 pg/ml and PCT  $\geq$  2 ng/ml

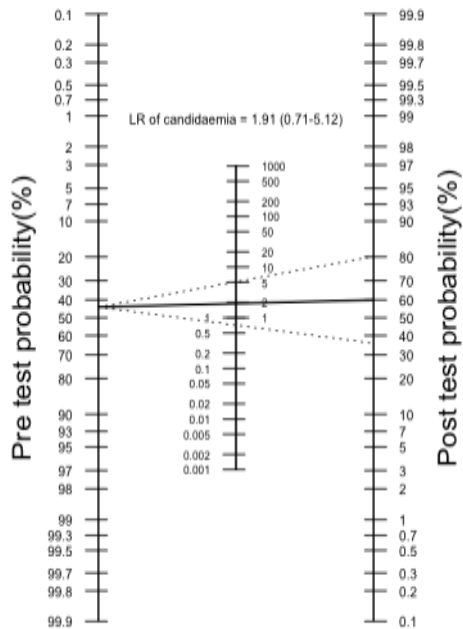

h) BDG < 80 pg/ml and PCT < 2 ng/ml

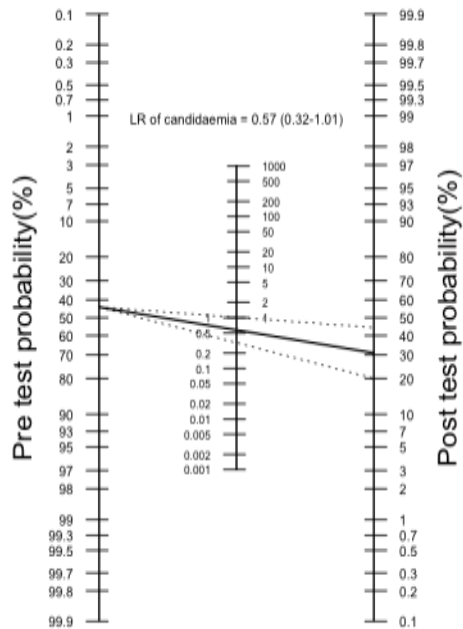

**Legend.** The likelihood ratio (LR) of candidemia according to the different combinations of tests results is expressed with its 95% confidence intervals (CI) in parentheses; BDG, (1,3)- $\beta$ -D-glucan; PCT, procalcitonin. Solid and dotted lines indicate changes from pre-test to post-test probability of candidaemia according to the LR of the disease and its 95% CI, respectively, at the prevalence of candidaemia registered in our population (44%). Panels a and b show the influence of BDG results on the post-test probability of candidaemia independently of PCT results. It is worth noting that both BDG  $\geq$  80 pg/ml and BDG < 80 pg/ml considerably influenced

the post-test probabilities of the two diseases. A less marked but appreciable change in the post-test probability of candidaemia and bacteraemia was also observed when low ( $< 2$  ng/ml) or high ( $\geq 2$  ng/ml) PCT results were considered independently of BDG (panels c and d). When the two markers were used in combination, the presence of concordant BDG and PCT results indicative of candidaemia (BDG  $\geq 80$  pg/ml and PCT  $< 2$  ng/ml) had a greater impact in favouring the diagnosis of candidaemia compared to the two markers considered separately (panel e). In contrast, when BDG and PCT concordantly indicated bacteraemia (BDG  $< 80$  pg/ml and PCT  $\geq 2$  ng/ml), their combined performance in favouring bacteraemia was very similar to that of BDG used alone (panel f). Finally, in the case of discordant BDG and PCT results, a positive or negative BDG only slightly altered the probabilities of candidaemia and bacteraemia when paired with discordant PCT values (panels g and h).
